# Supplementary material
Source: Springer Nature journal article supplement (https://www.springermedizin.de/resource/supplementary/12903_2013_344_MOESM3_ESM.pdf/9516944)
Supplement: MOESM3 [file 9516944]

### **Initial recruitment prior to screening for eligibility**

Patient with three or more months orofacial pain.  
Verbal description and initial recruitment prior to screening

Complete recruitment proforma and send to team

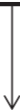

### **Follow-up and enrollment**

Verbal completion of eligibility Phase 1 Baseline Screening Questionnaire (BSQ1)

Confirm eligibility via BSQ1

Written consent

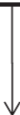

### **Data collection**

Baseline: Case-report form (CRF) Questionnaires 1a, 2a, 3a, 4

6 months: Questionnaires 1b, 2b, 3b

12 months: Questionnaire 4 in addition to 1b, 2b, 3b

14 months: Questionnaire 5 only

18 months: Questionnaires 1b, 2b, 3b

24 months: Questionnaire 4 in addition to 1b, 2b, 3b
